# Supplementary material for: Efficient detection of Cr3+ and Cr2O72− using a Zn(ii) luminescent metal–organic framework
Source: Royal Society of Chemistry journal article supplement (doi:10.1039/c9nj05999g), 2020-01-01
Supplement: c9nj05999g1.pdf [file c9nj05999g1.pdf]

## Efficient detection of $\text{Cr}^{3+}$ and $\text{Cr}_2\text{O}_7^{2-}$ based on a Zn(II) luminescent metal–organic framework

Qi Guo,<sup>[a]</sup> Tingting Ma,<sup>[a]</sup> Liuqing Zhou,<sup>[b]</sup> Jing-xin Ma,<sup>\*[a]</sup> Jinhui Yang,<sup>[a]</sup> and Qingfeng Yang<sup>[a]</sup>

<sup>a</sup> State Key Laboratory of High-efficiency Utilization of Coal and Green Chemical Engineering, National Demonstration Center for Experimental Chemistry Education, College of Chemistry and Chemical Engineering, Ningxia University, Yinchuan 750021, China

<sup>b</sup> Department of Otorhinolaryngology, People's Hospital of Ningxia Hui Autonomous Region, Yinchuan 750002, China

**Table S1** Selected Bond Distances (Å) and Angles(°) of **1**

| Bond Distances |          |
|----------------|----------|
| Zn1-O4         | 2.021(4) |
| Zn1-O6         | 2.000(5) |
| Zn1-O4a        | 2.021(4) |
| Zn1-O1b        | 2.022(4) |
| Zn1-O1c        | 2.022(4) |
| Zn2-O3         | 2.014(4) |
| Zn2-O5         | 1.995(6) |
| Zn2-O3a        | 2.014(4) |
| Zn2-O2b        | 2.015(4) |
| Zn2-O2c        | 2.015(4) |

  

| Bond Angles |            |
|-------------|------------|
| O4-Zn1-O6   | 99.35(18)  |
| O4-Zn1-O4a  | 86.9(2)    |
| O1b -Zn1-O4 | 87.0(2)    |
| O1c-Zn1-O4  | 158.43(19) |
| O4a-Zn1-O6  | 99.35(18)  |
| O1b-Zn1-O6  | 102.05(17) |
| O1c-Zn1-O6  | 102.05(17) |
| O1b-Zn1-O4a | 158.43(19) |
| O1c-Zn1-O4a | 87.0(2)    |
| O1b-Zn1-O1c | 91.2(2)    |
| O3-Zn2-O5   | 103.4(2)   |
| O3-Zn2-O3a  | 87.4(2)    |
| O2b -Zn2-O3 | 87.2(2)    |
| O2c-Zn2-O3  | 156.98(19) |
| O3a-Zn2-O5  | 103.4(2)   |
| O2b-Zn2-O5  | 99.6(2)    |
| O2c-Zn2-O5  | 99.6(2)    |
| O2b-Zn2-O3a | 156.98(19) |
| O2c-Zn2-O3a | 87.2(2)    |
| O2b-Zn2-O2c | 89.0(2)    |

Symmetry transformations used to generate equivalent atoms: a= y, x, z; b= 1/2-y, -1/2+x, 1/2-z; c= -1/2+x, 1/2-y, 1/2-z.

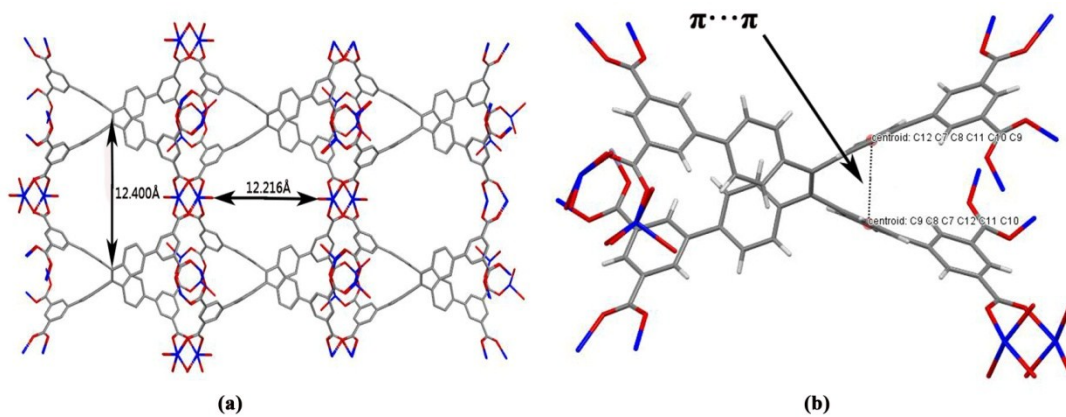

**Fig. S1** (a) The pore size of **1** (C: grey, Zn: blue, O: red, H is omitted for clarity); (b)  $\pi$ - $\pi$  stacking in **1** (C: grey, Zn: blue, O: red, H: white).

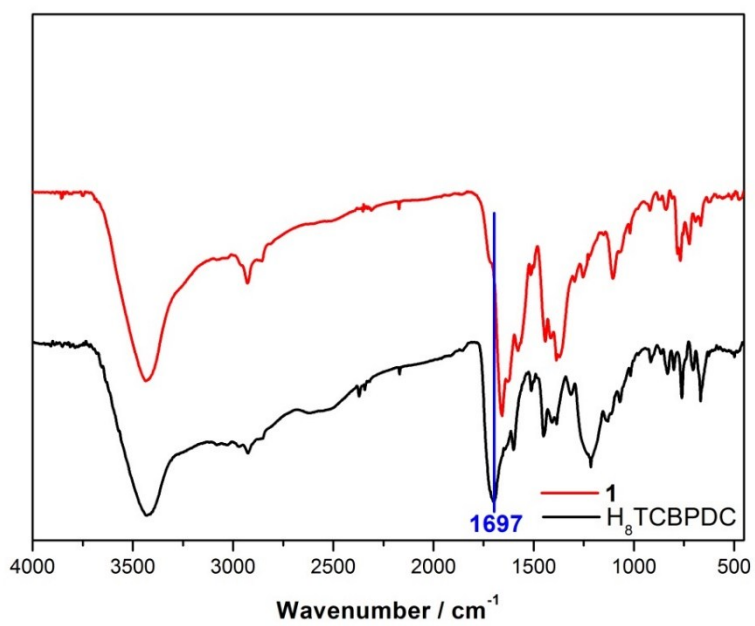

**Fig. S2** IR spectrum of **1** and free  $\text{H}_8\text{TCBPDC}$ .

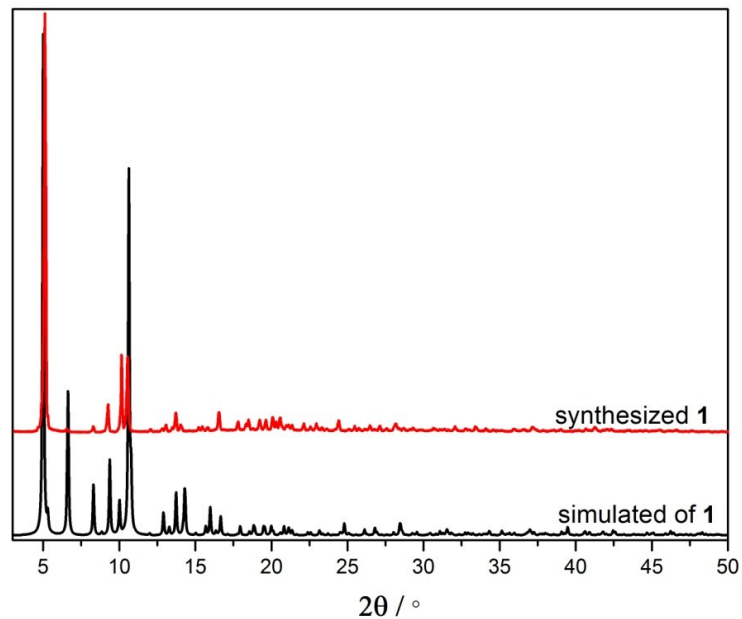

Fig. S3 PXRD patterns of **1** for simulated (black) and the as-synthesized (red).

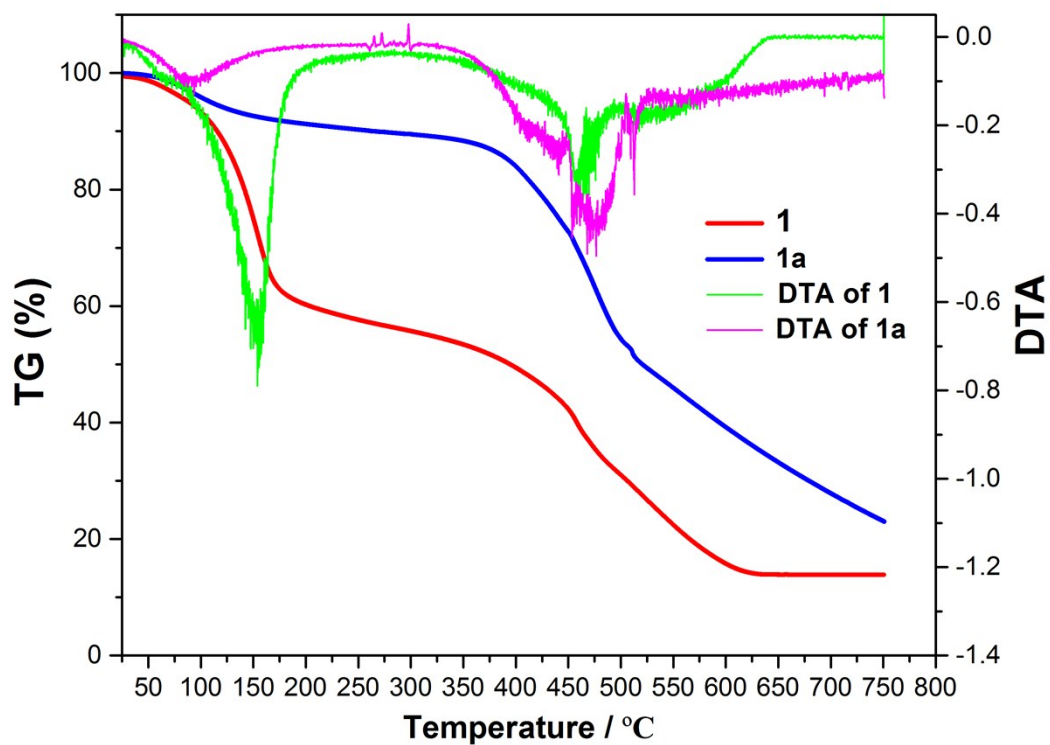

Fig. S4 The TG and DTA curves of **1a** and **1**.

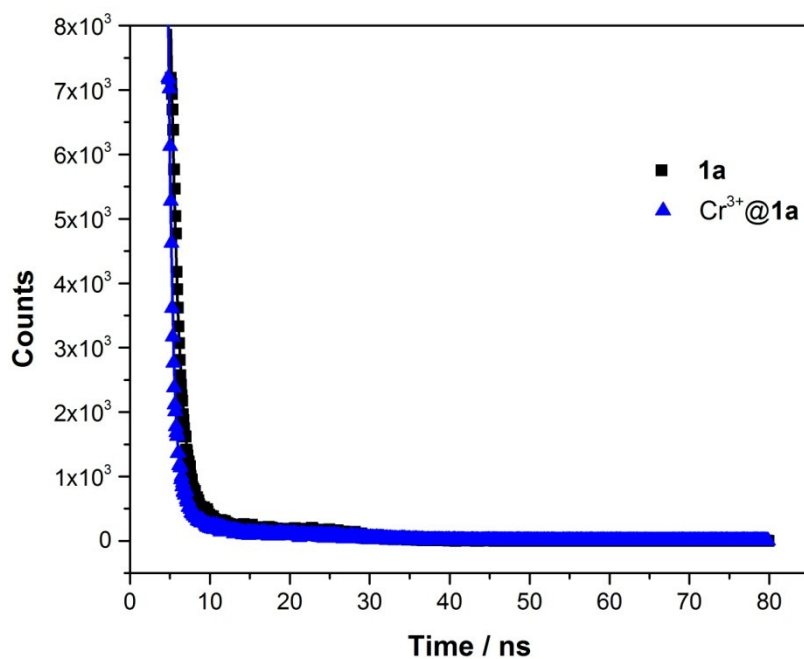

Fig. S5 Fit result of the time-resolved fluorescence decay traces of **1a** and  $\text{Cr}^{3+}$ @**1a**.

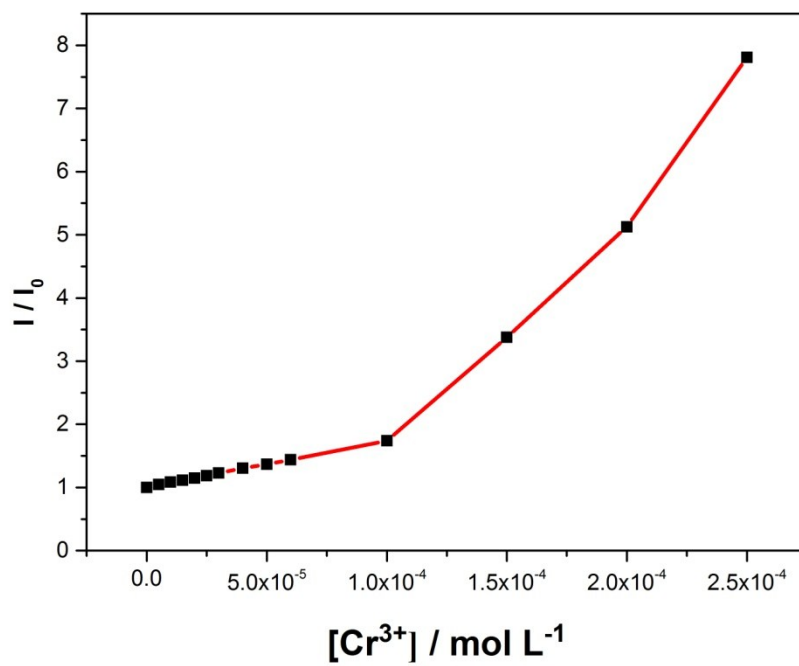

Fig. S6 The  $I_0/I$  versus the concentration of  $\text{Cr}^{3+}$  ion for **1a** (from 0 to 0.25 mM).

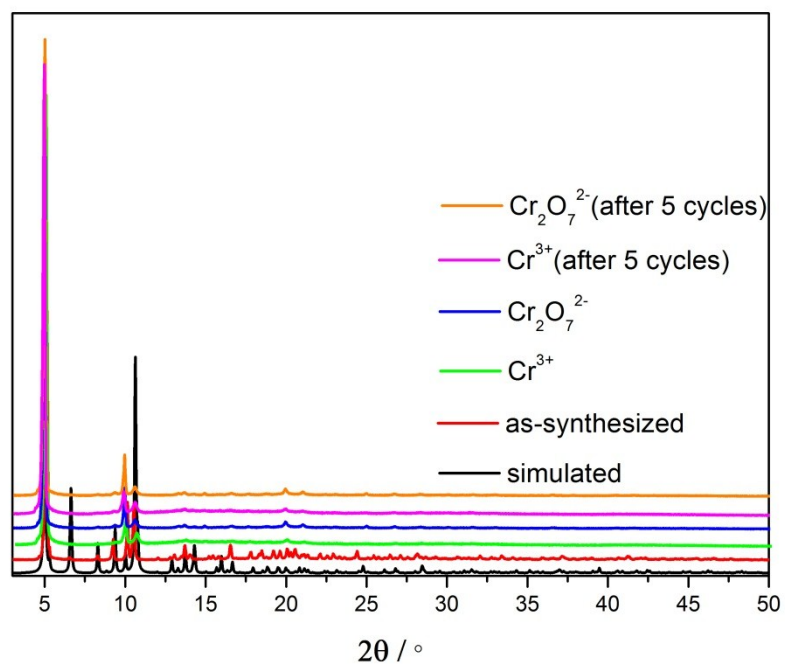

**Fig. S7** PXR D patterns of simulated, the as-synthesized,  $\text{Cr}^{3+}@1\mathbf{a}$ ,  $\text{Cr}_2\text{O}_7^{2-}@1\mathbf{a}$ ,  $\text{Cr}^{3+}$  (after 5 cycles) and  $\text{Cr}_2\text{O}_7^{2-}$  (after 5 cycles).

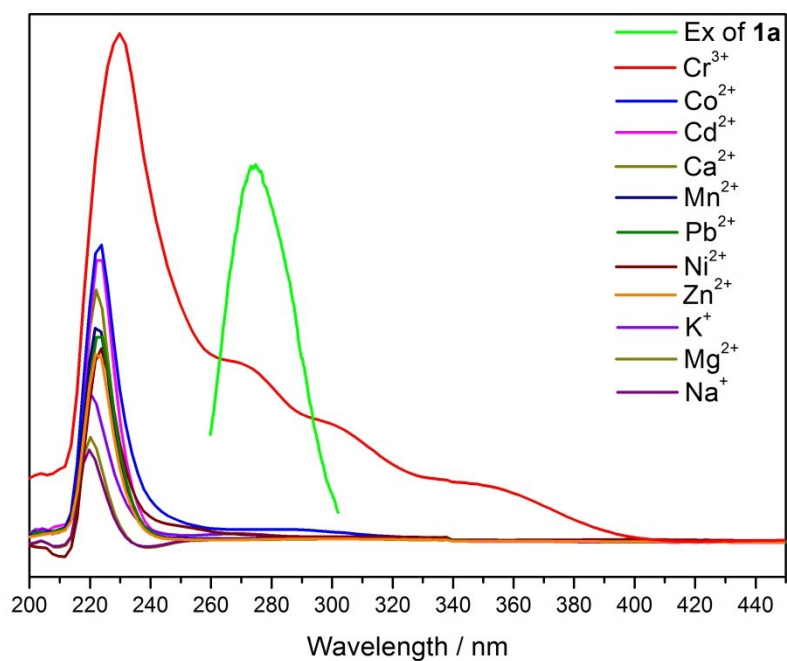

**Fig. S8** UV-Vis adsorption spectrum of  $\text{M}(\text{NO}_3)_n$  aqueous solution and the excitation spectrum of 1a.

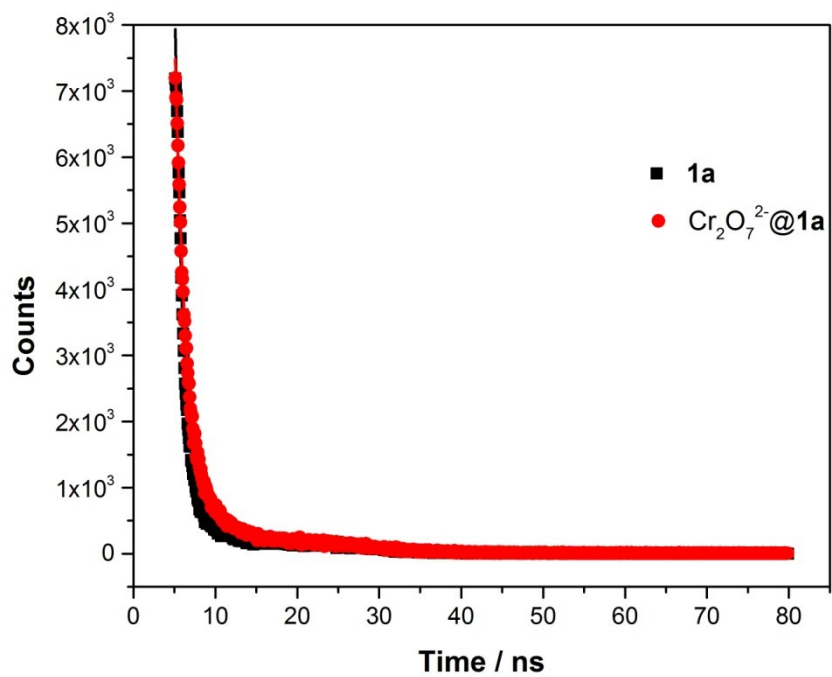

**Fig. S9** Fit result of the time-resolved fluorescence decay traces of **1a** and Cr<sub>2</sub>O<sub>7</sub><sup>2-</sup>@**1a**.

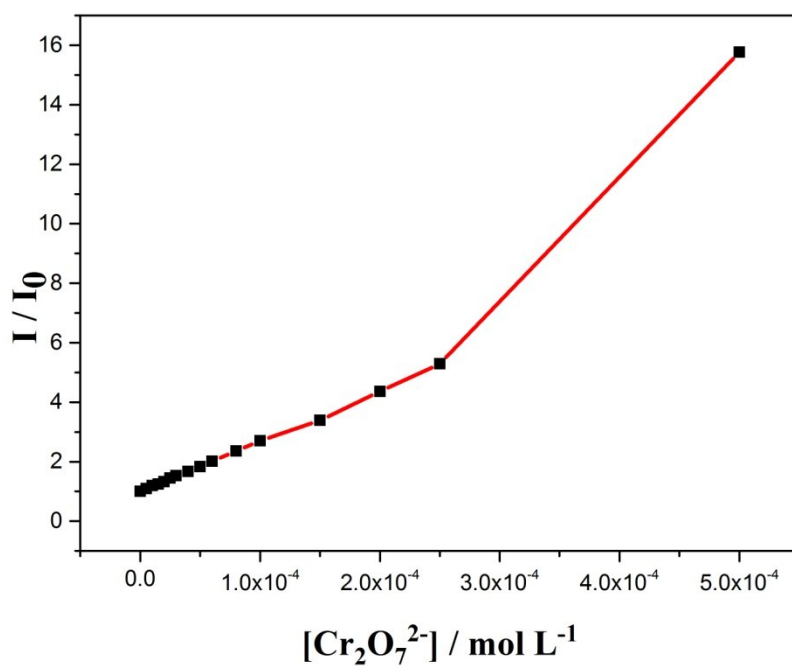

**Fig. S10** The  $I_0/I$  versus the concentration of Cr<sub>2</sub>O<sub>7</sub><sup>2-</sup> ion for **1a** (from 0 to 0.5 mM).

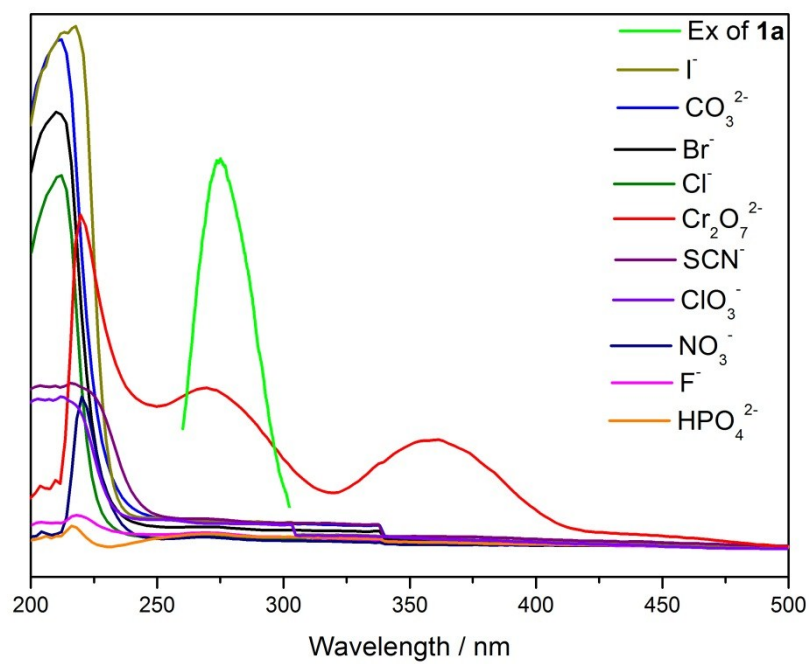

**Fig. S11** UV-Vis adsorption spectrum of  $K_{11}(A)$  aqueous solution and the excitation spectrum of **1a**.
